# Supplementary material for: Pro-Oxidant Enzymes, Redox Balance and Oxidative Damage to Proteins, Lipids and DNA in Colorectal Cancer Tissue. Is Oxidative Stress Dependent on Tumour Budding and Inflammatory Infiltration?
Source: PubMed Central journal article supplement (PMC7352177; doi:10.3390/cancers12061636), 2020-06-20
Supplement: cancers-12-01636-s001.pdf [file cancers-12-01636-s001.pdf]

# Supplementary Materials: Pro-Oxidant Enzymes, Redox Balance and Oxidative Damage to Proteins, Lipids and DNA in Colorectal Cancer Tissue. Is Oxidative Stress Dependent on Tumour Budding and Inflammatory Infiltration?

Justyna Zińczuk, Mateusz Maciejczyk, Konrad Zaręba, Anna Pryczynicz, Violetta Dymicka-Piekarska, Joanna Kamińska, Olga Koper-Lenkiewicz, Joanna Matowicka-Karna, Bogusław Kędra, Anna Zalewska and Katarzyna Guzińska-Ustymowicz

Table S1. Oxidative stress biomarkers in relation to clinical-pathological parameters.

| Parameter | Male vs female                                                  |                                                                       | adenocarcinoma vs mucinous adenocarcinoma               |                                                              | T2 vs T3 (depth of invasion)                           |                                                          | N0 vs N1+N2 (lymph node metastasis)                     |                                                          | M0 vs M1 (distant metastasis)                           |                                                          | Stage at diagnosis - I+II vs III+IV                      |                                                          | Absent vs present vascular invasion                               | Absent vs present neural invasion                        | Inflammatory infiltration in the invasive front: absent and weak vs moderate and strong | Inflammatory infiltration in the tumor center: absent and weak vs moderate and strong | Tumour budding <5 vs tumour budding >5                   |
|-----------|-----------------------------------------------------------------|-----------------------------------------------------------------------|---------------------------------------------------------|--------------------------------------------------------------|--------------------------------------------------------|----------------------------------------------------------|---------------------------------------------------------|----------------------------------------------------------|---------------------------------------------------------|----------------------------------------------------------|----------------------------------------------------------|----------------------------------------------------------|-------------------------------------------------------------------|----------------------------------------------------------|-----------------------------------------------------------------------------------------|---------------------------------------------------------------------------------------|----------------------------------------------------------|
|           | Non-tumour                                                      | Tumour                                                                | Non-tumour                                              | Tumour                                                       | Non-tumour                                             | Tumour                                                   | Non-tumour                                              | Tumour                                                   | Non-tumour                                              | Tumour                                                   | Non-tumour                                               | Tumour                                                   | Non-tumour                                                        | Tumour                                                   | Non-tumour                                                                              | Tumour                                                                                | Tumour                                                   |
| NOX       | p=0.121<br>4.032<br>(2.179-5.236)<br>vs 4.925<br>(1.660-19.79)  | p=0.242<br>5.355<br>(5.165-9.165)<br>vs 6.414<br>(4.941-12.06)        | p=0.544<br>5.01 (1.79-17.66)<br>vs 4.54 (3.52-9.31)     | <b>p&lt;0.05</b><br>6.60 (5.03-11.73)<br>vs 5.24 (4.94-9.57) | p=0.477<br>4.93 (1.66-9.54)<br>vs 4.77 (3.15-19.79)    | p=0.303<br>5.56 (5.17-9.17)<br>vs 6.41 (4.94-12.06)      | p=0.840<br>5.56 (1.66-19.79)<br>vs 4.77 (3.15-11.26)    | p=0.702<br>4.84 (4.98-12.27)<br>vs 6.41 (4.94-10.75)     | p=0.802<br>4.85 (2.18-11.27)<br>vs 6.04 (4.97-10.75)    | p=0.333<br>4.85 (4.97-10.75)<br>vs 7.51 (3.152-11.26)    | p=0.889<br>5.613 (4.980-10.79)<br>vs 6.271 (5.456-10.11) | p=0.389<br>5.613 (4.94-12.05)<br>vs 6.41 (5.16-7.49)     | p=0.550<br>5.78 (4.98-10.75)<br>vs 6.41 (5.16-7.49)               | p=0.296<br>6.89 (4.98-10.75)<br>vs 5.86 (5.16-7.49)      | p=0.092<br>6.89 (5.46-12.06)<br>vs 5.47 (4.94-10.75)                                    | p=0.196<br>6.89 (4.98-12.06)<br>vs 5.51 (4.94-10.72)                                  | p=0.278<br>7.64 (4.98-12.05)<br>vs 5.96 (4.94-10.72)     |
| XO        | p=0.297<br>10.98<br>(10.20-12.40)<br>vs 12.10<br>(9.47-18.84)   | <b>p=0.039</b><br>10.88<br>(10.19-14.17)<br>vs 13.56<br>(10.17-21.05) | p=0.665<br>12.11 (9.48-18.46)<br>vs 11.96 (10.20-13.05) | p=0.126<br>13.86 (10.18-20.28)<br>vs 12.69 (10.53-14.07)     | p=0.396<br>11.69 (9.59-14.73)<br>vs 12.10 (9.47-18.84) | p=0.176<br>12.69 (10.15-17.88)<br>vs 14.07 (10.07-21.16) | p=0.357<br>11.84 (9.47-18.84)<br>vs 12.59 (9.54-14.73)  | p=0.946<br>13.54 (10.19-17.96)<br>vs 13.19 (10.17-21.05) | p=0.802<br>12.05 (9.54-17.35)<br>vs 11.95 (11.72-13.16) | p=0.957<br>13.54 (10.19-17.96)<br>vs 13.30 (12.69-14.88) | p=0.718<br>12.01 (9.47-18.84)<br>vs 12.15 (9.54-14.73)   | p=0.454<br>13.56 (10.19-17.96)<br>vs 12.78 (10.17-14.88) | <b>p&lt;0.05</b><br>14.30 (11.23-21.05)<br>vs 12.87 (10.17-16.25) | p=0.296<br>13.54 (11.23-17.96)<br>vs 12.69 (10.17-16.25) | <b>p&lt;0.05</b><br>12.69 (10.19-21.05)<br>vs 14.41 (10.17-17.96)                       | p=0.346<br>13.91 (10.17-21.05)<br>vs 13.30 (10.19-15.34)                              | p=0.549<br>13.79 (11.23-21.05)<br>vs 13.30 (10.17-16.47) |
| SOD       | p=0.681<br>1.010<br>(0.835-1.272)<br>vs 0.986<br>(0.254-2.608)  | p=0.658<br>1.932<br>(0.939-2.960)<br>vs 2.178<br>(0.751-4.112)        | p=0.751<br>1.01 (0.29-2.34)<br>vs 0.94 (0.83-1.08)      | p=0.654<br>2.21 (0.76-4.00)<br>vs 1.35 (0.94-3.97)           | p=0.836<br>0.96 (0.47-1.27)<br>vs 1.00 (0.25-2.61)     | p=0.251<br>1.49 (0.94-2.96)<br>vs 2.24 (0.75-4.11)       | p=0.458<br>1.61 (0.47-1.45)<br>vs 3.68 (0.84-0.93-4.11) | p=0.164<br>1.61 (0.75-3.68)<br>vs 1.45 (0.25-0.93-4.11)  | p=0.092<br>0.93 (0.44-1.45)<br>vs 1.30 (0.99-2.61)      | p=0.142<br>2.21 (0.93-3.97)<br>vs 1.08 (0.75-2.38)       | p=0.934<br>1.871 (0.471-1.447)<br>vs 2.169 (0.254-2.608) | p=0.782<br>1.871 (0.784-3.676)<br>vs 2.169 (0.751-4.112) | p=0.912<br>2.02 (0.94-3.97)<br>vs 2.24 (0.75-4.11)                | p=0.959<br>2.14 (0.78-3.676)<br>vs 2.24 (0.93-4.11)      | p=0.662<br>2.21 (0.93-4.11)<br>vs 2.29 (0.75-3.97)                                      | p=0.677<br>2.14 (0.93-4.11)<br>vs 2.18 (0.75-3.96)                                    | p=0.163<br>1.61 (0.94-2.79)<br>vs 2.74 (0.75-4.11)       |
| CAT       | p=0.467<br>0.044<br>(0.013-0.097)<br>vs 0.065<br>(0.015-0.1500) | p=0.635<br>0.201<br>(0.056-0.359)<br>vs 0.152<br>(0.031-0.421)        | p=0.795<br>0.06 (0.01-0.15)<br>vs 0.05 (0.04-0.13)      | <b>p&lt;0.05</b><br>0.16 (0.06-0.41)<br>vs 0.13 (0.03-0.16)  | p=0.094<br>0.04 (0.01-0.09)<br>vs 0.07 (0.02-0.15)     | p=0.371<br>0.17 (0.06-0.36)<br>vs 0.14 (0.03-0.42)       | p=0.669<br>0.05 (0.01-0.13)<br>vs 0.15 (0.02-0.42)      | p=0.158<br>0.13 (0.05-0.31)<br>vs 0.18 (0.13-0.42)       | p=0.591<br>0.06 (0.02-0.13)<br>vs 0.06 (0.02-0.07)      | p=0.391<br>0.16 (0.05-0.31)<br>vs 0.13 (0.13-0.15)       | p=0.934<br>0.056 (0.012-0.132)<br>vs 0.068 (0.018-0.15)  | p=0.858<br>0.135 (0.052-0.359)<br>vs 0.141 (0.120-0.228) | p=0.492<br>0.17 (0.03-0.36)<br>vs 0.14 (0.05-0.42)                | p=0.898<br>0.15 (0.05-0.36)<br>vs 0.18 (0.06-0.42)       | <b>p&lt;0.05</b><br>0.13 (0.03-0.36)<br>vs 0.18 (0.09-0.42)                             | <b>p&lt;0.05</b><br>0.13 (0.03-0.35)<br>vs 0.18 (0.05-0.42)                           | p=0.223<br>0.16 (0.13-0.32)<br>vs 0.13 (0.03-0.42)       |

|                     |                                                                         |                                                                       |                                                                   |                                                                       |                                                                   |                                                                       |                                                                                 |                                                                       |                                                                 |                                                                 |                                                                |                                                                       |                                                                |                                                                   |                                                                |                                                                |                                                                   |
|---------------------|-------------------------------------------------------------------------|-----------------------------------------------------------------------|-------------------------------------------------------------------|-----------------------------------------------------------------------|-------------------------------------------------------------------|-----------------------------------------------------------------------|---------------------------------------------------------------------------------|-----------------------------------------------------------------------|-----------------------------------------------------------------|-----------------------------------------------------------------|----------------------------------------------------------------|-----------------------------------------------------------------------|----------------------------------------------------------------|-------------------------------------------------------------------|----------------------------------------------------------------|----------------------------------------------------------------|-------------------------------------------------------------------|
| <b>GPx</b>          | p=0.155<br>0.183<br>(0.169-0.189)<br>vs 0.232<br>0.223<br>(0.137-0.399) | <b>p=0.029</b><br>0.166<br>(0.147-0.194)<br>vs 0.232<br>(0.127-0.304) | p=0.260<br>0.23 (0.14-0.39)<br>vs 0.19<br>0.21                    | p=0.236<br>0.23 (0.13-0.30)<br>vs 0.19<br>(0.15-0.25)                 | p=0.836<br>0.21 (0.16-0.33)<br>vs 0.21<br>0.39                    | p=0.982<br>0.21<br>(0.15-0.30)<br>vs 0.30<br>0.21<br>(0.13-0.30)      | p=0.357<br>0.22<br>(0.14-0.30)<br>vs 0.39<br>0.28                               | p=0.544<br>0.23<br>(0.15-0.30)<br>vs 0.30<br>0.19<br>(0.13-0.30)      | p=0.802<br>0.21<br>(0.16-0.30)<br>vs 0.22<br>0.16-0.3<br>8)     | p=0.971<br>0.21<br>(0.15-0.30)<br>vs 0.23<br>0.19-0.2<br>4)     | p=0.114<br>0.232<br>(0.169-0.399)<br>vs 0.185<br>(0.157-0.383) | p=0.760<br>0.232<br>(0.147-0.304)<br>vs 0.197<br>(0.127-0.271)        | p=0.438<br>0.23<br>(0.15-0.30)<br>vs 0.19<br>0.13-0.2<br>7)    | p=0.212<br>0.23<br>(0.15-0.30)<br>vs 0.19<br>0.13-0.2<br>5)       | p=0.348<br>0.23<br>(0.13-0.30)<br>vs 0.19<br>(0.15-0.30)       | p=0.417<br>0.23<br>(0.13-0.30)<br>vs 0.19<br>(0.15-0.25)       | p=0.080<br>0.24<br>(0.15-0.30)<br>vs 0.19<br>(0.13-0.25)          |
| <b>GR</b>           | p=0.635<br>23.31<br>(19.89-27.06)<br>vs 25.41<br>(18.87-39.97)          | p=0.327<br>23.91<br>(20.76-27.05)<br>vs 26.74<br>(19.14-42.75)        | p=0.312<br>25.68 (19.01-39.21)<br>vs 23.50<br>(19.89-25.97)       | p=0.078<br>26.77<br>(19.74-41.15)<br>vs 24.21<br>(20.76-28.16)        | p=0.697<br>25.22 (19.89-33.40)<br>vs 26.73<br>25.41 (18.87-39.97) | p=0.945<br>26.76<br>(20.76-36.34)<br>vs 26.73<br>(19.14-42.75)        | p=0.271<br>25.70<br>(19.60-39.97)<br>vs 24.30<br>(18.87-29.68)                  | p=0.252<br>26.80<br>(20.76-36.34)<br>vs 26.70<br>(19.14-42.75)        | p=0.415<br>25.18<br>(19.42-33.40)<br>vs 25.414<br>(24.36-39.97) | p=0.410<br>26.77<br>(20.76-36.34)<br>vs 26.70<br>(24.21-26.72)  | p=0.389<br>25.71<br>(19.60-36.34)<br>vs 24.33<br>(18.87-39.97) | p=0.081<br>26.81<br>(20.76-36.34)<br>vs 26.54<br>(19.14-26.83)        | p=0.177<br>26.91<br>(21.04-42.75)<br>vs 26.72<br>(19.14-29.74) | p=0.078<br>26.78<br>(21.54-36.34)<br>vs 24.21<br>(19.14-29.74)    | p=0.285<br>26.77<br>(19.14-36.34)<br>vs 26.72<br>(20.76-42.74) | p=0.614<br>26.75<br>(19.14-42.75)<br>vs 26.74<br>(20.76-29.38) | p=0.579<br>26.76<br>(21.04-42.75)<br>vs 26.74<br>(19.14-29.74)    |
| <b>GSH</b>          | <b>p=0.015</b><br>0.668<br>(0.097-5.493 vs 1.373<br>(0.558-0.955)       | p=0.884<br>1.491<br>(1.170-2.267)<br>vs 1.348<br>(0.332-4.184)        | p=0.112 1.33<br>(0.21-4.97)<br>vs 0.82<br>(0.53-1.49)             | p=0.839 1.61<br>(0.40-3.88)<br>vs 1.35<br>(1.13-3.06)                 | p=0.872<br>1.43 (0.09-2.46)<br>vs 1.07<br>(0.56-5.49)             | p=0.582<br>1.26<br>(0.78-4.18)<br>vs 1.07<br>(0.33-3.06)              | p=0.840<br>1.26<br>(0.09-2.98)<br>vs 1.33<br>(0.33-2.30)                        | p=0.893<br>1.91<br>(0.61-2.98)<br>vs 1.33<br>(0.33-4.18)              | p=0.267<br>1.07<br>(0.53-3.49)<br>vs 1.49<br>(1.06-2.96)        | p=0.802<br>1.48<br>(0.76-3.0493)<br>vs 1.35<br>6) vs 1.55<br>7) | p=0.718<br>1.156<br>(0.096-5.184)<br>vs 1.758<br>(0.558-2.961) | p=0.803<br>1.310<br>(0.332-4.184)<br>vs 1.758<br>(0.606-2.980)        | p=0.507<br>1.24<br>(0.78-4.184)<br>vs 1.91<br>6) vs 1.60<br>9) | p=0.979<br>1.34<br>(0.61-3.0493)<br>vs 1.60<br>(0.79-2.19)        | p=0.930<br>1.46<br>(0.61-4.184)<br>vs 1.36<br>(0.33-3.06)      | p=0.599<br>1.54<br>(0.33-4.26)<br>vs 1.36<br>(0.77-3.06)       | p=0.611<br>1.25<br>(0.61-4.184)<br>vs 1.62<br>(0.33-2.98)         |
| <b>GSSG</b>         | p=0.681<br>0.163 (0.093-0.317)<br>vs 0.144<br>(0.009-0.424)             | p=0.327<br>0.229<br>(0.170-0.349)<br>vs 0.301<br>(0.115-0.456)        | p=0.874<br>0.144<br>(0.009-0.424)<br>vs 0.157<br>(0.093-0.246)    | p=0.635<br>0.300<br>(0.127-0.456)<br>vs 0.259<br>(0.115-0.374)        | p=0.396<br>0.174<br>(0.077-0.316)<br>vs 0.135<br>(0.009-0.424)    | p=0.477<br>0.293<br>(0.115-0.367)<br>vs 0.300<br>(0.127-0.456)        | p=0.291<br>0.306<br>(0.118-0.415)<br>vs 0.131<br>(0.009-0.301)                  | p=0.312<br>0.306<br>(0.115-0.415)<br>vs 0.276<br>(0.127-0.419)        | p=0.971<br>0.139<br>(0.009-0.424)<br>vs 0.178<br>(0.013-0.246)  | p=0.163<br>0.301<br>(0.127-0.456)<br>vs 0.155<br>(0.115-0.339)  | p=0.085<br>0.182<br>(0.035-0.424)<br>vs 0.122<br>(0.009-0.301) | p=0.058<br>0.309<br>(0.170-0.456)<br>vs 0.259<br>(0.115-0.419)        | p=0.674<br>0.306<br>(0.127-0.456)<br>vs 0.295<br>(0.115-0.456) | p=0.832<br>0.295<br>(0.127-0.456)<br>vs 0.300<br>(0.115-0.426)    | p=0.983<br>0.301<br>(0.134-0.426)<br>vs 0.294<br>(0.115-0.456) | p=0.368<br>0.289<br>(0.127-0.426)<br>vs 0.339<br>(0.115-0.456) | p=0.177<br>0.293<br>(0.115-0.410)<br>vs 0.300<br>(0.167-0.456)    |
| <b>Redox status</b> | <b>p=0.008</b><br>2.947<br>(0.048-4.913)<br>vs 14.77<br>(1.511-659.7)   | p=0.728<br>11.23<br>(3.912-22.27)<br>vs 10.08<br>(0.374-61.67)        | p=0.106<br>14.77<br>(0.048-659.7)<br>vs 4.311<br>(3.018-8.946)    | <b>p=0.017</b><br>0.300<br>(0.127-0.456)<br>vs 13.35<br>(3.912-24.96) | p=0.477<br>10.61<br>(0.048-53.39)<br>vs 14.58<br>(1.511-659.7)    | p=0.908<br>7.424<br>(1.633-61.67)<br>vs 9.7<br>11.22<br>(0.374-32.15) | <b>p&lt;0.0001</b><br>16.20<br>(0.048-65.67)<br>vs 9.7<br>12.97<br>(0.127-0.15) | p=0.637<br>10.50<br>(0.374-61.67)<br>vs 6.7<br>12.97<br>(2.379-32.97) | p=0.591<br>13.43<br>(0.048-21.41)<br>vs 8.946<br>(6.381-15.97)  | p=0.915<br>10.28<br>(0.374-61.67)<br>vs 14.1<br>(2.379-15.79)   | p=0.678<br>7.406<br>(0.048-7.14)<br>vs 6.7<br>(2.545-56.15)    | p=0.326<br>4.736<br>(0.374-61.67)<br>vs 6.7<br>(2.379-32.15)          | p=0.521<br>10.92<br>(1.633-61.67)<br>vs 12.97<br>(0.374-32.15) | p=0.916<br>10.28<br>(0.374-61.67)<br>vs 11.22<br>(2.733-15.79)    | p=0.913<br>9.316<br>(2.379-61.67)<br>vs 11.54<br>(0.374-31.35) | p=0.982<br>10.65<br>(0.37-61.67)<br>vs 10.92<br>(1.63-24.96)   | p=0.842<br>10.50<br>(2.323-61.67)<br>vs 11.22<br>(0.374-32.15)    |
| <b>TAC</b>          | <b>p=0.046</b><br>1.103<br>(0.982-1.157)<br>vs 1.283<br>(0.898-2.024)   | p=0.635<br>1.316<br>(1.081-1.712)<br>vs 1.427<br>(1.049-2.293)        | p=0.403<br>1.25 (0.92-1.98)<br>vs 1.18<br>1.29                    | p=0.126<br>1.44 (1.05-2.18)<br>vs 1.34<br>1.44                        | p=0.566<br>1.16 (0.98-1.49)<br>vs 1.22<br>2.02                    | p=0.836<br>1.41<br>(1.08-1.74)<br>vs 1.44<br>(1.05-2.29)              | p=0.357<br>1.24<br>(0.98-2.02)<br>vs 1.19<br>(0.89-2.29)                        | p=0.805<br>1.43<br>(1.07-1.83)<br>vs 1.42<br>(1.05-2.29)              | p=0.123<br>1.19<br>(0.97-1.69)<br>vs 1.32<br>(1.29-2.02)        | p=0.185<br>1.44<br>(1.06-1.83)<br>vs 1.34<br>(1.19-1.36)        | p=0.889<br>4.195<br>(0.982-1.851)<br>vs 1.255<br>(0.898-2.024) | p=0.360<br>1.430<br>(1.065-1.737)<br>vs 1.349<br>(1.049-1.590)        | p=0.982<br>1.43<br>(1.07-2.29)<br>vs 1.44<br>(1.05-1.79)       | p=0.345<br>1.43<br>(1.08-1.83)<br>vs 1.36<br>(1.05-1.69)          | p=0.230<br>1.45<br>(1.05-1.83)<br>vs 1.36<br>(1.06-2.29)       | p=0.303<br>1.44<br>(1.05-2.29)<br>vs 1.37<br>(1.08-1.71)       | p=0.912<br>1.41<br>(1.05-2.29)<br>vs 1.43<br>(1.17-1.71)          |
| <b>TOS</b>          | p=0.071<br>1.195<br>(1.091-5.035)<br>vs 4.543<br>(0.601-11.87)          | p=0.924<br>5.228<br>(4.311-6.198)<br>vs 5.123<br>(0.401-12.50)        | <b>p&lt;0.001</b><br>4.39 (0.62-9.88)<br>vs 30.40<br>(8.17-85.25) | p=0.885<br>5.16 (0.61-11.74)<br>vs 4.39<br>(11.87)                    | p=0.630<br>4.48 (0.60-10.46)<br>vs 4.39<br>(11.87)                | p=0.422<br>4.712<br>(2.13-11.14)<br>vs 5.20<br>(0.40-12.50)           | p=0.770<br>4.39<br>(0.60-11.87)<br>vs 5.02<br>(8.92)                            | p=0.702<br>5.02<br>(1.24-12.50)<br>vs 6.14<br>(0.40-8.92)             | p=0.857<br>4.67-10.46<br>vs 4.57<br>(2.22-7.71)                 | p=0.333<br>5.10<br>(1.24-9.48)<br>vs 7.73<br>(3.34-11.14)       | p=0.637<br>4.195<br>(0.601-11.87)<br>vs 4.629<br>(1.746-7.813) | p=0.063<br>4.739<br>(1.238-12.50)<br>vs 5.0<br>6.394<br>(3.334-11.14) | p=0.116<br>4.71<br>(0.40-12.50)<br>vs 6.39<br>(3.01-11.14)     | p=0.070<br>4.83<br>(1.24-9.48)<br>vs 6.39<br>(4.31-11.14)         | p=0.844<br>5.06<br>(0.40-12.50)<br>vs 5.12<br>(1.24-11.14)     | p=0.417<br>4.99<br>(0.41-9.48)<br>vs 5.72<br>(3.01-12.56)      | p=0.176<br>4.61<br>(1.24-11.14)<br>vs 5.72<br>(0.40-12.50)        |
| <b>OSI</b>          | p=0.082<br>1.055<br>(0.991-5.127)<br>vs 3.257<br>(0.526-10.03)          | p=0.824<br>3.463<br>(3.315-5.736)<br>vs 3.740<br>(1.162-8.640)        | p=0.977<br>3.09 (0.51-8.48)<br>vs 3.55<br>10.03                   | p=0.583 3.35<br>(0.50-8.10)<br>vs 3.59<br>(2.54-8.21)                 | p=0.663<br>3.24 (0.53-9.04)<br>vs 3.24<br>10.03                   | p=0.909<br>3.35<br>(1.23-8.21)<br>vs 3.74<br>(0.28-8.64)              | p=0.911<br>3.09<br>(0.53-10.03)<br>vs 3.29<br>(1.69-6.54)                       | p=0.515<br>3.35<br>(1.16-8.64)<br>vs 4.43<br>(2.48-6.14)              | p=0.971<br>3.09<br>(0.99-9.04)<br>vs 3.55<br>(1.69-3.81)        | p=0.299<br>3.48<br>(1.23-6.14)<br>vs 6.49<br>(2.48-8.21)        | p=0.560<br>2.566<br>(0.526-10.03)<br>vs 3.418<br>(1.686-6.538) | p=0.056<br>3.339<br>(1.162-8.640)<br>vs 5.042<br>(2.484-8.212)        | p=0.223<br>3.21<br>(1.16-8.64)<br>vs 4.04<br>(2.07-8.21)       | <b>p&lt;0.05</b><br>3.33<br>(1.23-6.49)<br>vs 5.23<br>(3.08-8.21) | p=0.948<br>3.89<br>(1.23-8.64)<br>vs 3.59<br>(1.16-8.21)       | p=0.245<br>3.24<br>(1.16-6.13)<br>vs 3.74<br>(2.07-8.75)       | <b>p&lt;0.05</b><br>2.77<br>(1.16-8.21)<br>vs 4.43<br>(2.07-8.63) |
| <b>AGE</b>          | p=0.054<br>0.481<br>(0.336-0.647)<br>vs 0.715<br>(0.422-1.174)          | p=0.242<br>0.685<br>(0.541-1.120)<br>vs 0.891<br>(0.106-2.083)        | p=0.839<br>0.65 (0.36-1.14)<br>vs 0.65<br>(0.44-0.99)             | p=0.112<br>0.94 (0.20-1.93)<br>vs 0.61<br>(0.54-1.17)                 | p=0.069<br>0.57 (0.34-0.93)<br>vs 0.77<br>(0.42-1.17)             | p=0.449<br>0.79<br>(0.11-1.47)<br>vs 0.89<br>(0.49-2.08)              | p=0.200<br>0.61<br>(0.34-1.02)<br>vs 0.78<br>(0.42-1.17)                        | p=0.170<br>1.02<br>(0.54-2.08)<br>vs 0.78<br>(0.11-1.25)              | p=0.915<br>0.65<br>(0.37-1.12)<br>vs 0.81<br>(0.47-0.84)        | p=0.410<br>0.84<br>(0.24-1.87)<br>vs 1.25<br>(0.61-1.43)        | p=0.802<br>0.605<br>(0.336-1.018)<br>vs 0.645<br>(1.686-6.538) | p=0.233<br>1.070<br>(0.541-2.083)<br>vs 0.794<br>(0.107-1.431)        | p=0.465<br>0.94<br>(0.55-1.48)<br>vs 0.82<br>(0.11-2.08)       | <b>p&lt;0.05</b><br>0.61<br>(0.49-0.9)<br>vs 1.02<br>(0.55-1.47)  | p=0.879<br>0.87<br>(0.11-1.47)<br>vs 0.82<br>(0.54-2.08)       | p=0.742<br>0.83<br>(0.07-1.41)<br>vs 0.98<br>(0.51-2.17)       | p=0.739<br>0.832<br>(0.107-1.470)<br>vs 0.851<br>(0.494-2.083)    |

|               |                                                                |                                                                             |                                                              |                                                                     |                                                              |                                                                               |                                                                     |                                                                           |                                                                    |                                                                       |                                                                        |                                                                        |                                                                       |                                                                      |                                                              |                                                              |                                                                    |
|---------------|----------------------------------------------------------------|-----------------------------------------------------------------------------|--------------------------------------------------------------|---------------------------------------------------------------------|--------------------------------------------------------------|-------------------------------------------------------------------------------|---------------------------------------------------------------------|---------------------------------------------------------------------------|--------------------------------------------------------------------|-----------------------------------------------------------------------|------------------------------------------------------------------------|------------------------------------------------------------------------|-----------------------------------------------------------------------|----------------------------------------------------------------------|--------------------------------------------------------------|--------------------------------------------------------------|--------------------------------------------------------------------|
| <b>AOPP</b>   | p=0.429<br>6.276<br>(1.676-10.16)<br>vs 7.787<br>(1.445-18.35) | <b>p=0.027</b><br>10.49<br>(9.095-11.20)<br>) vs 13.32<br>(7.395-26.37<br>) | p=0.977<br>7.31 (1.47-<br>17.83) vs 7.93<br>(3.86-<br>10.16) | p=0.285<br>13.04<br>(7.47-25.02)<br>vs 10.36<br>(9.09-<br>22.35)    | p=0.176<br>6.09 (1.67-<br>16.27) vs<br>7.93 (1.45-<br>18.36) | <b>p&lt;0.05</b><br>11.02<br>(7.39-26.<br>37) vs<br>13.61<br>(7.68-<br>22.36) | p=0.357<br>6.28<br>(1.68-<br>16.27) vs<br>11.71<br>(1.45-<br>18.35) | p=0.964<br>12.50<br>(8.47-<br>26.37) vs<br>12.16<br>(7.39-<br>20.96)      | p=0.857<br>7.31<br>(1.55-16.<br>27) vs<br>8.52<br>(2.52-12.<br>20) | p=0.693<br>12.20<br>(7.67-22.<br>35) vs<br>14.34<br>(10.36-15<br>.52) | p=0.846<br>6.126<br>(1.676-16<br>.27) vs<br>7.737<br>(1.445-18<br>.35) | p=0.739<br>12.77<br>(8.469-26<br>.37) vs<br>12.55<br>(7.395-20<br>.95) | p=0.982<br>12.20<br>(10.16-26<br>.37) vs<br>13.61<br>(7.39-22.<br>35) | p=0.221<br>12.50<br>(8.48-22.<br>34) vs<br>11.20<br>(7.68-14.<br>32) | p=0.727<br>12.77<br>(7.39-26.37)<br>vs 12.02<br>(8.47-22.35) | p=0.154<br>13.46<br>(7.39-26.37)<br>vs 11.20<br>(7.47-22.45) | p=0.808<br>12.36<br>(7.39-26.37)<br>vs 12.24<br>(8.47-20.95)       |
| <b>MDA</b>    | p=0.062<br>0.501<br>(0.421-0.608)<br>vs 0.660<br>(0.210-2.184) | p=0.728<br>0.909<br>(0.641-1.458<br>) vs 0.845<br>(0.478-1.718<br>)         | p=0.665<br>0.65 (0.25-<br>1.97) vs 0.57<br>(0.48-<br>0.96)   | p=0.839<br>0.87 (0.48-<br>1.66) vs 0.84<br>(0.64-<br>1.05)          | p=0.231<br>0.55 (0.21-<br>0.72) vs 0.69<br>(0.38-<br>2.18)   | p=0.836<br>0.89<br>(0.59-<br>1.46) vs<br>0.85<br>(0.48-<br>1.72)              | p=0.669<br>0.61<br>(0.21-<br>2.18) vs<br>0.66<br>(0.38-<br>1.21)    | <b>p&lt;0.05</b><br>0.58<br>(0.27-<br>0.93) vs<br>0.93<br>(0.85-<br>1.07) | p=0.858<br>0.63<br>(0.38-1.3<br>4) vs 0.59<br>(0.48-0.8<br>3)      | p=0.911<br>0.87<br>(0.48<br>1.50) vs<br>0.85<br>(0.49-<br>1.72)       | p=0.846<br>0.608<br>(0.210-2.<br>184) vs<br>0.600<br>(0.377-0.<br>828) | p=0.360<br>0.891<br>(0.514-1.<br>458) vs<br>0.783<br>(0.477-1.<br>265) | p=0.465<br>0.91<br>(0.51-1.7<br>2) vs 0.81<br>(0.48-1.4<br>6)         | p=0.979<br>0.87<br>(0.51-1.5<br>0) vs 0.81<br>(0.49-1.4<br>2)        | p=0.445<br>1.02<br>(0.49-1.50)<br>vs 0.84<br>(0.48-1.72)     | p=0.263<br>0.92<br>(0.49-1.72)<br>vs 0.84<br>(0.48-1.46)     | <b>p&lt;0.001</b><br>0.61<br>(0.21-1.21)<br>vs 0.85<br>(0.48-1.46) |
| <b>8-OHdG</b> | p=0.359<br>0.772<br>(0.736-0.823)<br>vs 0.867<br>(0.516-1.438) | p=0.071<br>0.9209<br>(0.747-1.023<br>) vs 1.119<br>(0.704-1.684<br>)        | p=0.931<br>0.80 (0.54-<br>1.40) vs 0.82<br>(0.73-<br>0.93)   | <b>p&lt;0.05</b><br>1.12 (0.73-<br>1.62) vs 0.96<br>(0.75-<br>1.11) | p=0.766<br>0.81 (0.73-<br>0.97) vs 0.87<br>(0.52-<br>1.44)   | p=0.136<br>1.022<br>(0.75-<br>1.15) vs<br>1.15<br>(0.70-<br>1.68)             | p=0.271<br>0.85<br>(0.65-<br>1.44) vs<br>0.78<br>(0.52-<br>0.97)    | p=0.458<br>1.04<br>(0.75-<br>1.40) vs<br>1.15<br>(0.70-<br>1.68)          | p=0.371<br>0.81<br>(0.63-1.1<br>1) vs 0.97<br>(0.73-1.2<br>9)      | p=0.543<br>1.07<br>(0.75-1.4<br>0) vs 1.12<br>(0.97-1.4<br>5)         | p=0.305<br>0.867<br>(0.654-1.<br>438) vs<br>0.776<br>(0.630-1.<br>285) | p=0.718<br>1.023<br>(0.747-1.<br>400) vs<br>1.101<br>(0.704-1.<br>446) | p=0.912<br>1.04<br>(0.80-1.6<br>8) vs 1.11<br>(0.70-1.4<br>5)         | p=0.429<br>1.09<br>(0.82-1.4<br>5) vs 0.97<br>(0.70-1.4<br>0)        | p=0.169<br>1.14<br>(0.70-1.45)<br>vs 1.02<br>(0.75-1.68)     | p=0.181<br>1.14<br>(0.70-1.68)<br>vs 1.02<br>(0.75-1.22)     | p=0.808<br>1.07<br>(0.70-1.68)<br>vs 1.12<br>(0.75-1.40)           |

**Table S2.** Comparison of oxidative stress biomarkers between tumour tissue and normal adjacent mucosa.

| Parameter | Tumour vs non-tumour tissue |                        | p-value            |
|-----------|-----------------------------|------------------------|--------------------|
| NOX       | 6.128<br>(4.941-12.06)      | 4.774<br>(1.660-11.26) | <b>0.0012</b>      |
| XO        | 13.53<br>(10.17-21.05)      | 12.01<br>(9.466-18.84) | <b>0.0146</b>      |
| SOD       | 2.178<br>(0.751-4.112)      | 0.986<br>(0.254-2.608) | <b>&lt; 0.0001</b> |
| CAT       | 0.152<br>(0.031-0.422)      | 0.057<br>(0.013-0.150) | <b>&lt; 0.0001</b> |
| GPx       | 0.214<br>(0.126-0.304)      | 0.205<br>(0.137-0.399) | 0.901              |
| GR        | 26.74<br>(19.14-42.75)      | 25.41<br>(18.87-39.97) | 0.192              |
| GSH       | 1.362<br>(0.332-4.184)      | 1.156<br>(0.097-3.493) | 0.214              |
| TAC       | 1.427<br>(1.049-2.293)      | 1.199<br>(0.898-2.024) | <b>0.009</b>       |
| TOS       | 5.123<br>(0.601-12.87)      | 4.394<br>(0.401-11.51) | 0.198              |
| OSI       | 3.362<br>(0.281-8.640)      | 3.239<br>(0.101-7.457) | 0.327              |
| AGE       | 0.871<br>(0.106-2.083)      | 0.646<br>(0.336-1.174) | <b>0.0034</b>      |
| AOPP      | 12.24<br>(7.395-26.37)      | 7.675<br>(1.445-18.35) | <b>0.0004</b>      |
| MDA       | 0.853<br>(0.477-1.718)      | 0.615<br>(0.210-1.284) | <b>0.0007</b>      |
| 8-OHdG    | 1.083<br>(0.704-1.684)      | 0.823<br>(0.516-1.438) | <b>&lt; 0.0001</b> |

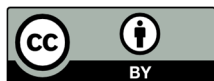

© 2020 by the authors. Licensee MDPI, Basel, Switzerland. This article is an open access article distributed under the terms and conditions of the Creative Commons Attribution (CC BY) license (<http://creativecommons.org/licenses/by/4.0/>).
